# Supplementary material
Source: ML conference proceedings conference paper supplement (https://proceedings.neurips.cc/paper_files/paper/2023/hash/b663eb1512ce6c268e3e56f34c6d2959-Abstract.html)
Supplement: Supplementary file 1 [file b663eb1512ce6c268e3e56f34c6d2959-Supplemental-Conference.pdf]

---

# Game Solving with Online Fine-Tuning

---

Ti-Rong Wu,<sup>1\*</sup> Hung Guei,<sup>1\*</sup> Ting Han Wei,<sup>2</sup> Chung-Chin Shih,<sup>1,3</sup> Jui-Te Chin,<sup>3</sup> I-Chen Wu<sup>3,4</sup>

<sup>1</sup>Institute of Information Science, Academia Sinica, Taiwan

<sup>2</sup>Department of Computing Science, University of Alberta, Canada

<sup>3</sup>Department of Computer Science, National Yang Ming Chiao Tung University, Taiwan

<sup>4</sup>Research Center for Information Technology Innovation, Academia Sinica, Taiwan

tirongwu@iis.sinica.edu.tw, hguei@iis.sinica.edu.tw, tinghan@ualberta.ca  
rockmanray.cs02@nycu.edu.tw, pikachin.cs10@nycu.edu.tw, icwu@cs.nctu.edu.tw

## A Implementation details

### A.1 PCN training

We basically follow the same PCN training method by Wu et al. [1] but replace the AlphaZero algorithm with the Gumbel AlphaZero algorithm [2], where the simulation count is set to  $32^2$  in self-play and starts by sampling 16 actions. The architecture of the PCN contains three residual blocks with 256 hidden channels. A total of 400,000 self-play games are generated for the whole training. During optimization, the learning rate is fixed at 0.02, and the batch size is set to 1,024. The PCN is optimized for 500 steps for every 2,000 self-play games. The pre-trained PCN requires around 13 hours to train on a machine with four 1080Ti GPUs, i.e. 52 1080Ti GPU-hours. For the online trainer, we use the same hyperparameters as the pre-trained PCN but only use one GPU.

### A.2 7x7 Killall-Go solver

Our solver is built upon the state-of-the-art (SOTA) 7x7 Killall-Go solver [3] except for the following three changes. First, our solver uses PCN as heuristics while the SOTA solver trains a network with *Faster to Life* (FTL) techniques. Both networks aim to provide a faster move for solving, but FTL requires additional (*komi*<sup>3</sup>) settings in solving, so PCN is much easier to use in our solver. Second, we implement the transposition table based on Shih et al. [4]. This greatly reduces the solving time. Finally, we implement a solution for resolving *Graph-History-Interaction* (GHI, i.e. cycles in Go) [5] problems to ensure the correctness of reusing solutions in the transposition table, based on Kishimoto and Müller [6, 7]’s GHI solution.

### A.3 Worker design

The worker is itself a Killall-Go solver. It is GPU bound, i.e. it relies on GPUs more than CPUs since the PCN (a neural network) requires intensive GPU computation. Thus, to fully utilize GPU resources, we implement batch GPU inferencing to accelerate PCN evaluations for workers. In practice, we collect 48 workers together in one process with multiple threads. The process runs MCTS selection for each worker independently. Namely, a total of 48 leaf nodes are generated and evaluated by PCN with one GPU at once. The 48 leaf nodes are collected as a batch for batch GPU

---

\*These authors contributed equally.

<sup>2</sup>The original PCN training used 400 simulation counts in the self-play, requiring much more computing resources than using Gumbel algorithm.

<sup>3</sup>Since Black plays the first stone in the game of Go, White usually earns some extra points called komi for balance.

inferencing, with a batch size of 48. This method greatly reduces the solving time when more workers are used. The baseline distributed game solver creates eight processes as workers, each with one GPU, for a total of 384 workers (eight processes with 48 workers). The online fine-tuning solver has the same number of workers for fairness, but uses seven GPUs (one GPU is spared for the online trainer); the configuration is six processes with 55 workers and one process with 54 workers.

## B Experiment details

### B.1 Setup

All experiments are conducted in three machines, each equipped with two Intel Xeon E5-2678 v3 CPUs, 192G RAM, and four GTX 1080Ti GPUs. We list other hyperparameters in Table 1.

For the memory used in solving, the manager requires 20G RAM for expanding every 1M nodes, and every 48 workers together in one process requires 30G RAM at most. Note that workers use the same amount of memory regardless of problem size. They are limited to 100,000 nodes per job; the job result is “unsolved” if a solution is not obtained within that limit.

Specifically, for BASELINE with 384 workers, solving *KA* used 2,103 seconds, required 3G RAM for the manager and 240G RAM for the workers; solving *KB* used 156,583 seconds, required 170G RAM for the manager and 240G RAM for the workers. However, for BASELINE with only 48 workers, solving *KA* used 12,151 seconds but only required 2G RAM for the manager and 30G RAM for the workers. Overall, the settings can be varied depending on available machines.

Table 1: Hyperparameters used in the baseline and online fine-tuning solvers. All variants of online fine-tuning solvers use the same settings.

|                |                           | BASELINE | ONLINE  |
|----------------|---------------------------|----------|---------|
| <b>Manager</b> | # GPUs                    | 1        | 1       |
|                | $v_{thr}$                 | 16.5     | 16.5    |
|                | $k$ for top-k selection   | 4        | 4       |
| <b>Worker</b>  | # GPUs                    | 8        | 7       |
|                | # workers                 | 384      | 384     |
|                | # node limitation per job | 100,000  | 100,000 |
| <b>Trainer</b> | # GPUs                    | 0        | 1       |

### B.2 Scalability of the distributed game solver

To evaluate the scalability of the distributed game solver, we run BASELINE with different numbers of workers on *KA*. Specifically, the solvers use 384, 192, 96, and 48 workers, using 8, 4, 2, and 1 GPU, respectively. Every 48 workers share one GPU. The results are shown in Table 2. Overall, the speedup is around 1.8 times faster when the number of workers is doubled (up to 384 workers due to our machine limitation).

Table 2: Detailed statistics for solving *KA* by BASELINE with different numbers of workers.

| # Workers | # Nodes     | Time (s) | Manager # Nodes | # Jobs | Avg. Job Time (s) | Avg. Job # Nodes | # PCN | Solved Jobs (%) | Avg. Worker Loading (%) | Speedup |
|-----------|-------------|----------|-----------------|--------|-------------------|------------------|-------|-----------------|-------------------------|---------|
| 384       | 134,881,952 | 2,103    | 121,236         | 21,748 | 34.48             | 6,196.46         | 0     | 97.87%          | 94.53%                  | 5.78    |
| 192       | 120,676,465 | 3,596    | 99,678          | 18,598 | 35.92             | 6,483.32         | 0     | 98.44%          | 98.57%                  | 3.09    |
| 96        | 112,344,894 | 6,502    | 84,752          | 16,422 | 37.45             | 6,835.96         | 0     | 98.87%          | 98.90%                  | 1.71    |
| 48        | 109,362,406 | 12,151   | 74,665          | 15,292 | 37.78             | 7,146.73         | 0     | 99.05%          | 98.60%                  | 1.00    |

### B.3 Statistics of solving 7x7 Killall-Go three-move openings

Figure 1 shows the next winning moves (the fourth moves) of 16 three-move openings for both baseline and ONLINE-CP solvers. Generally, both solvers solve the openings at the same next moves,

except *JB*. The full solution trees for each opening can be found in this link: <https://rlg.iis.sinica.edu.tw/papers/neurips2023-online-fine-tuning-solver/solution-trees>. We also provide a tool and a README file for explaining the solution tree.

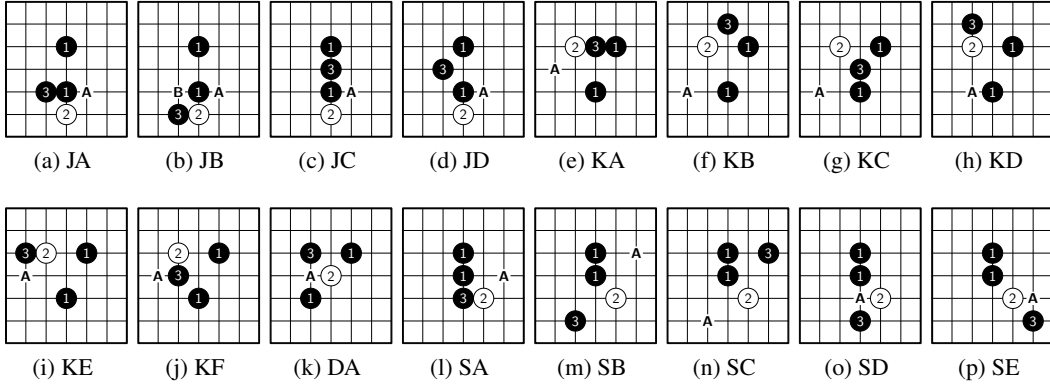

Figure 1: The solutions of the next winning move for 16 7x7 Killall-Go openings. For each opening, “A” and “B” represents the winning move found by the baseline solver and the online fine-tuning solver respectively. If both solvers solve the opening with the same winning move, only “A” is shown on the board.

It is worth mentioning that *JA* and *JB* are similar to one of the common josekis<sup>4</sup> played in 19x19 Go. The joseki usually occurs when Black makes a *corner enclosure* move, also known as *shimari* in Japanese, like the two stones marked as “1” in *JA* and *JB*. Then, White attempts to invade Black’s territories by playing at the stone marked as “2”. Judging by the online fine-tuning solver’s ability to solve *JA* and *JB*, we foresee a high potential to extend our work to solving other 19x19 Go corner josekis in the future.

In addition, Figure 2 shows the curve for average critical position lengths. These curves are all similar in the sense that it starts with small average lengths, which gradually increases during fine-tuning.

Table 3, Table 4, Table 5 and Table 6 list the experiment results of the baseline and three variants of online fine-tuning solvers respectively, in more detail than those in Table 1 in the main text. These tables include the number of nodes for solving, the solving time in seconds, the number of nodes used in the manager, the number of jobs, the average time for solving each job, the average number of nodes for solving each job, the number of updated PCNs, the success rate of solving jobs, and the average worker load during solving. In general, the solving time is correlated with the number of nodes and the number of jobs. For online fine-tuning, the solving time is also correlated with the number of PCNs as the trainer updates PCNs at a stable speed. Note that the number of PCNs is always 0 for the baseline solver, as they do not update PCNs during solving.

In our experiments, the average success rates of solving jobs are around 97.30%, 98.44%, 99.14% and 99.08% for the baseline and the online fine-tuning solvers, respectively. In addition, for some quickly solved openings, e.g. *KC*, *SA*, and *SB*, the average time for solving each job is far less than other difficult openings. While the workers are able to solve jobs quickly, the managers are relatively unable to create enough jobs for the workers, causing the workers to be relatively idle (lower avg. worker loading). Compared with the baseline solver, online fine-tuning solvers have better success rates of solving as well as lesser nodes for each job. This confirms that online fine-tuning successfully fine-tuned the PCNs for critical positions that the manager is interested in, thereby increasing the job efficiency overall.

#### B.4 Different PCN thresholds

We examine different  $v_{thr}$  from 11.5 to 21.5 on opening *JC*, using the baseline solver. The experiment result is presented in Table 7, where the four columns represent the examined  $v_{thr}$ , the total solving time, the average time for workers to solve jobs, and the job success rate. Among these PCN

<sup>4</sup>A joseki is a move sequence that is widely believed to be balanced play by both players.

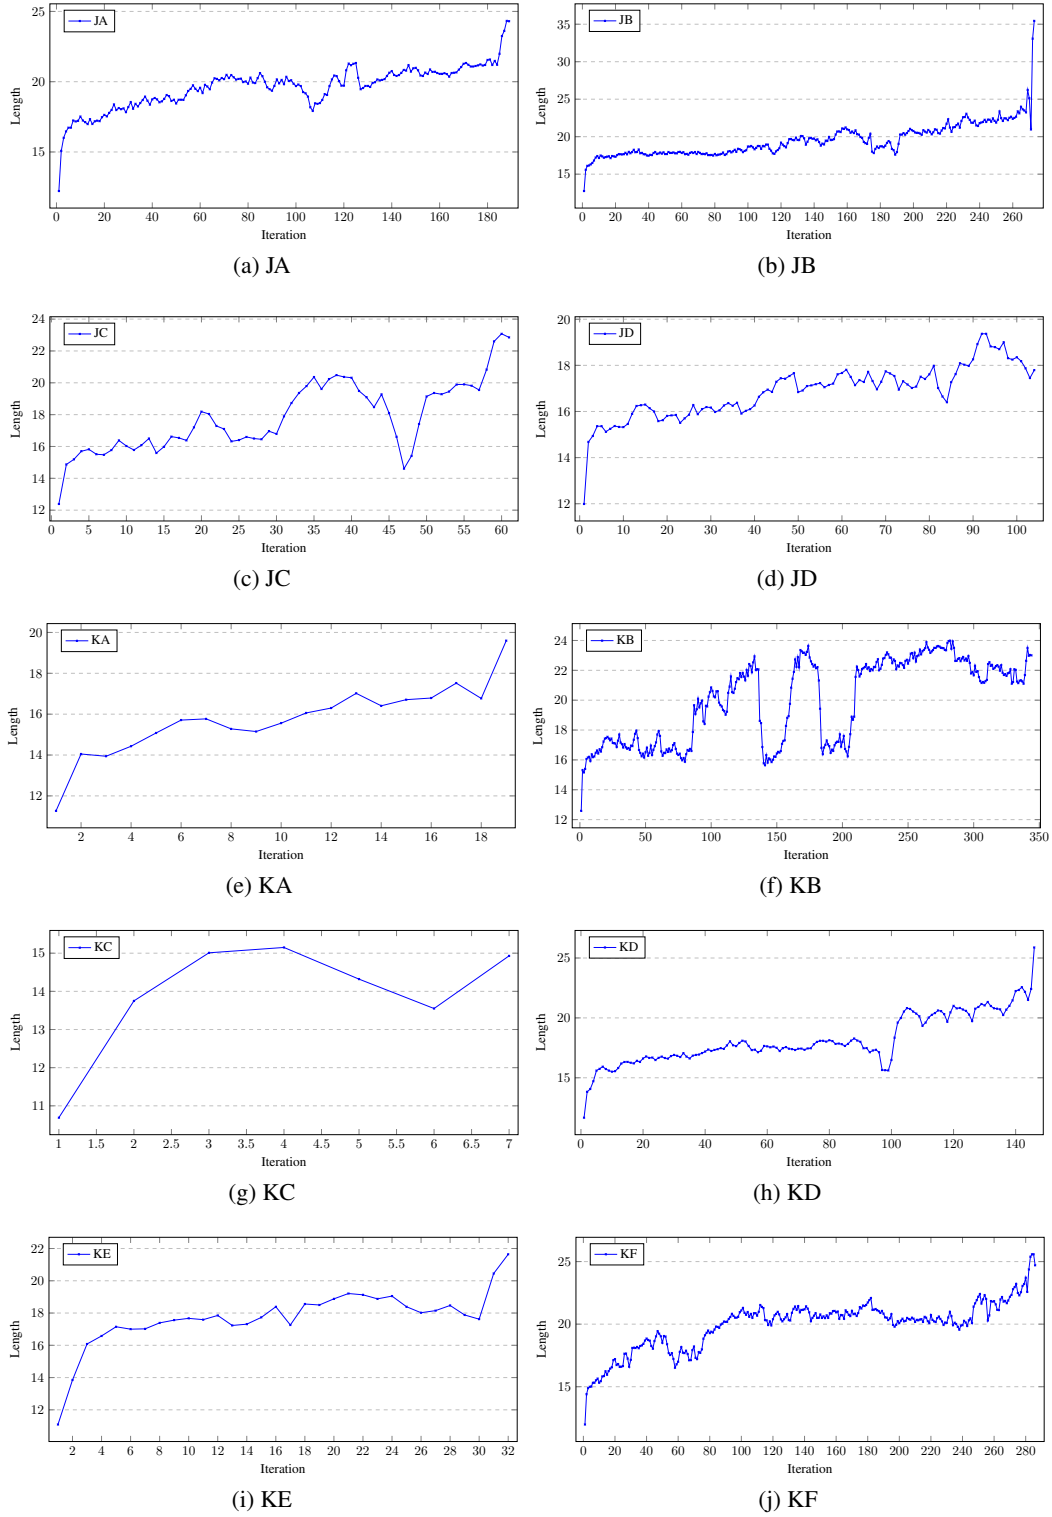

Figure 2: Average length of critical positions for each opening.

thresholds, we consider  $v_{thr} = 16.5$  to be a balanced setting as it performs well in the three metrics. However, the results also show that the performance is not necessarily sensitive to different  $v_{thr}$  settings, i.e. the solving time is similar when  $v_{thr} \in (15.5, 17.5)$ .

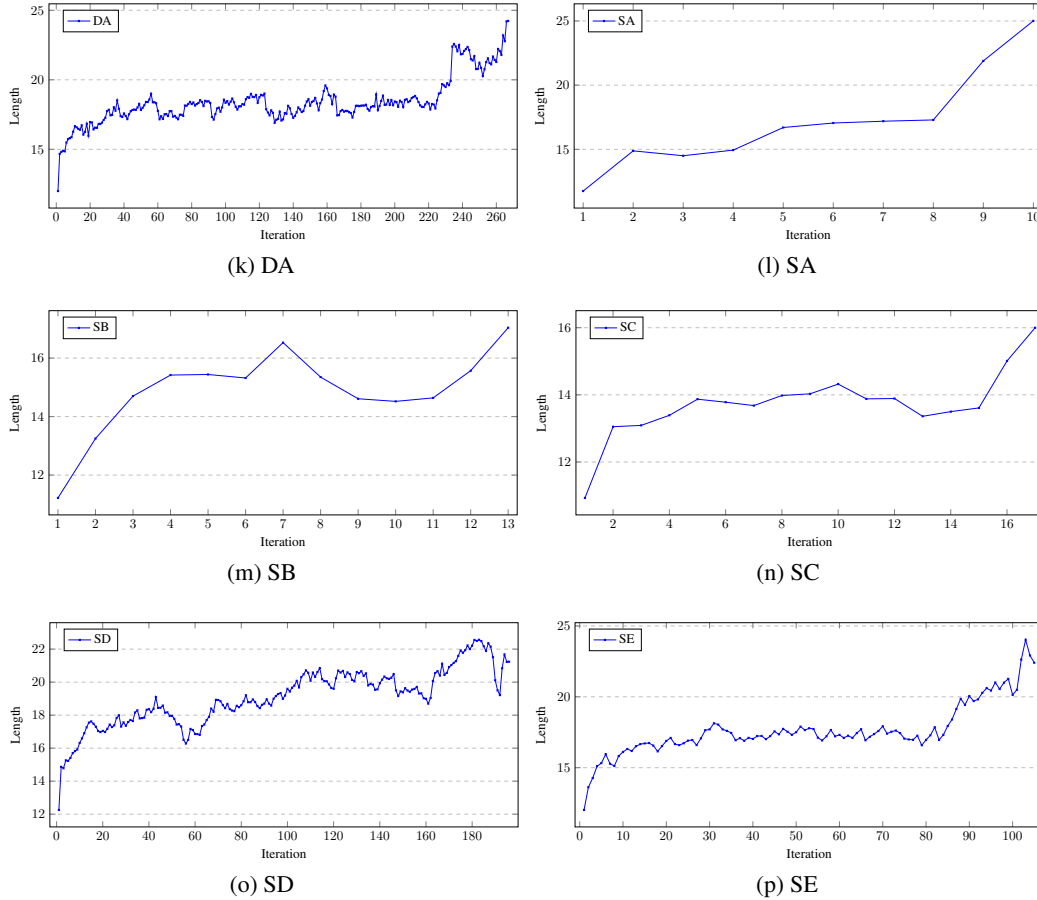

Figure 2: Average length of critical positions for each opening.

Table 3: Detailed statistics for the openings solved by BASELINE.

|    | # Nodes        | Time (s) | Manager<br># Nodes | # Jobs    | Avg. Job<br>Time (s) | Avg. Job<br># Nodes | # PCN | Solved<br>Jobs (%) | Avg. Worker<br>Loading (%) |
|----|----------------|----------|--------------------|-----------|----------------------|---------------------|-------|--------------------|----------------------------|
| JA | 8,964,444,959  | 142,115  | 4,842,554          | 792,465   | 68.68                | 11,305.99           | 0     | 96.83%             | 99.48%                     |
| JB | 7,137,514,712  | 155,786  | 3,689,548          | 635,263   | 93.90                | 11,229.72           | 0     | 96.80%             | 99.48%                     |
| JC | 721,004,784    | 12,514   | 900,221            | 165,308   | 23.66                | 4,356.14            | 0     | 98.96%             | 73.70%                     |
| JD | 1,271,426,148  | 30,209   | 655,078            | 128,885   | 89.32                | 9,859.73            | 0     | 97.75%             | 98.96%                     |
| KA | 134,881,952    | 2,103    | 121,236            | 21,748    | 34.48                | 6,196.46            | 0     | 97.87%             | 94.53%                     |
| KB | 10,153,035,632 | 156,583  | 8,241,207          | 1,240,258 | 48.34                | 8,179.58            | 0     | 98.20%             | 99.48%                     |
| KC | 38,217,263     | 747      | 72,880             | 15,284    | 10.33                | 2,495.71            | 0     | 98.39%             | 62.02%                     |
| KD | 2,754,213,379  | 47,494   | 1,499,735          | 246,500   | 73.67                | 11,167.20           | 0     | 97.07%             | 99.22%                     |
| KE | 1,197,819,407  | 18,771   | 1,024,660          | 150,490   | 47.14                | 7,952.65            | 0     | 97.79%             | 98.44%                     |
| KF | 9,516,440,320  | 147,271  | 5,208,724          | 789,225   | 71.50                | 12,051.36           | 0     | 96.88%             | 99.68%                     |
| DA | 7,322,743,383  | 112,874  | 4,326,195          | 636,200   | 67.90                | 11,503.33           | 0     | 95.62%             | 99.22%                     |
| SA | 51,272,288     | 937      | 79,967             | 17,772    | 14.26                | 2,880.50            | 0     | 98.37%             | 75.78%                     |
| SB | 215,380,103    | 3,860    | 288,751            | 52,191    | 22.91                | 4,121.23            | 0     | 97.99%             | 78.65%                     |
| SC | 97,559,402     | 1,557    | 113,821            | 22,376    | 23.31                | 4,354.92            | 0     | 97.94%             | 90.62%                     |
| SD | 8,187,017,679  | 124,644  | 4,286,025          | 668,654   | 71.36                | 12,237.62           | 0     | 95.18%             | 99.48%                     |
| SE | 4,297,808,879  | 64,227   | 2,234,093          | 345,124   | 71.00                | 12,446.47           | 0     | 95.10%             | 98.86%                     |

As demonstrated in the table,  $v_{thr}$  outside of this range deteriorates the solving performance. On the one hand, when  $v_{thr}$  is too high, e.g.  $v_{thr} = 21.5$ , only about 95% of jobs can be solved, implying that about 5% of the jobs are wasted. On the other hand, when  $v_{thr}$  is too low, e.g.  $v_{thr} = 11.5$ , the assigned jobs can be solved quickly with a high success rate. However, this requires the manager to assign more jobs, which increases the overhead of handling job assignments between the manager and

Table 4: Detailed statistics for the openings solved by ONLINE-SP.

|    | # Nodes       | Time (s) | Manager # Nodes | # Jobs  | Avg. Job Time (s) | Avg. Job # Nodes | # PCN | Solved Jobs (%) | Avg. Worker Loading (%) |
|----|---------------|----------|-----------------|---------|-------------------|------------------|-------|-----------------|-------------------------|
| JA | 4,054,562,593 | 69,699   | 2,491,326       | 479,455 | 55.45             | 8,451.41         | 359   | 98.49%          | 98.95%                  |
| JB | 3,378,672,517 | 83,454   | 1,607,080       | 327,626 | 97.49             | 10,307.68        | 424   | 97.27%          | 99.14%                  |
| JC | 819,264,890   | 13,963   | 704,540         | 137,752 | 35.96             | 5,942.28         | 57    | 98.08%          | 88.34%                  |
| JD | 846,365,092   | 19,396   | 500,259         | 106,495 | 69.00             | 7,942.77         | 113   | 98.50%          | 98.91%                  |
| KA | 143,814,448   | 2,621    | 174,202         | 34,222  | 26.17             | 4,197.31         | 14    | 98.55%          | 90.25%                  |
| KB | 3,794,290,131 | 64,493   | 3,671,889       | 548,306 | 43.54             | 6,913.33         | 305   | 98.99%          | 99.05%                  |
| KC | 45,217,101    | 1,156    | 100,985         | 21,847  | 11.12             | 2,065.09         | 6     | 99.47%          | 54.07%                  |
| KD | 1,504,977,329 | 25,715   | 986,849         | 202,651 | 48.37             | 7,421.58         | 126   | 98.86%          | 98.95%                  |
| KE | 214,614,577   | 3,917    | 246,259         | 50,422  | 28.29             | 4,251.48         | 21    | 98.85%          | 95.48%                  |
| KF | 6,080,836,868 | 100,690  | 5,431,753       | 855,725 | 44.93             | 7,099.72         | 519   | 99.19%          | 99.21%                  |
| DA | 3,015,438,589 | 50,046   | 2,682,998       | 418,088 | 45.56             | 7,206.03         | 248   | 98.55%          | 98.90%                  |
| SA | 54,574,495    | 1,471    | 122,611         | 25,403  | 11.78             | 2,143.52         | 7     | 98.47%          | 56.24%                  |
| SB | 65,970,358    | 1,423    | 124,986         | 25,917  | 15.46             | 2,540.62         | 7     | 98.10%          | 79.84%                  |
| SC | 213,889,777   | 3,553    | 141,447         | 32,739  | 39.32             | 6,528.86         | 19    | 98.06%          | 95.22%                  |
| SD | 3,821,472,453 | 63,058   | 2,224,352       | 406,191 | 59.27             | 9,402.59         | 329   | 97.37%          | 99.01%                  |
| SE | 2,065,528,927 | 33,437   | 1,647,455       | 282,992 | 44.79             | 7,293.07         | 166   | 98.21%          | 98.26%                  |

Table 5: Detailed statistics for the openings solved by ONLINE-CP.

|    | # Nodes       | Time (s) | Manager # Nodes | # Jobs  | Avg. Job Time (s) | Avg. Job # Nodes | # PCN | Solved Jobs (%) | Avg. Worker Loading (%) |
|----|---------------|----------|-----------------|---------|-------------------|------------------|-------|-----------------|-------------------------|
| JA | 1,288,601,416 | 22,384   | 1,314,785       | 259,008 | 32.68             | 4,970.07         | 186   | 99.48%          | 98.44%                  |
| JB | 1,576,437,139 | 31,957   | 1,643,806       | 327,442 | 36.67             | 4,809.38         | 272   | 99.46%          | 96.66%                  |
| JC | 316,391,324   | 6,537    | 538,369         | 109,298 | 17.09             | 2,889.83         | 59    | 99.27%          | 72.38%                  |
| JD | 545,655,175   | 11,083   | 501,953         | 109,891 | 38.12             | 4,960.85         | 102   | 99.32%          | 98.75%                  |
| KA | 111,838,889   | 2,102    | 159,614         | 32,153  | 22.60             | 3,473.37         | 18    | 99.70%          | 92.69%                  |
| KB | 2,242,789,149 | 38,947   | 3,202,296       | 575,365 | 24.45             | 3,892.46         | 343   | 99.65%          | 93.25%                  |
| KC | 26,441,989    | 758      | 69,052          | 15,423  | 9.12              | 1,709.97         | 6     | 99.01%          | 50.78%                  |
| KD | 955,257,191   | 17,434   | 1,222,772       | 227,427 | 26.86             | 4,194.90         | 145   | 99.69%          | 89.35%                  |
| KE | 181,418,954   | 3,336    | 261,253         | 49,484  | 24.25             | 3,660.93         | 30    | 98.86%          | 94.53%                  |
| KF | 2,107,185,330 | 35,418   | 2,555,399       | 427,993 | 31.27             | 4,917.44         | 285   | 99.60%          | 98.06%                  |
| DA | 1,761,842,477 | 30,313   | 2,556,573       | 421,268 | 26.16             | 4,176.17         | 266   | 99.60%          | 94.03%                  |
| SA | 41,863,480    | 992      | 86,749          | 19,634  | 12.60             | 2,127.77         | 9     | 98.57%          | 70.96%                  |
| SB | 55,541,455    | 1,364    | 125,338         | 27,612  | 11.64             | 2,006.96         | 12    | 98.48%          | 64.32%                  |
| SC | 98,661,355    | 1,715    | 116,980         | 24,770  | 24.34             | 3,978.38         | 16    | 98.17%          | 94.28%                  |
| SD | 1,395,444,447 | 23,751   | 1,575,572       | 278,198 | 32.24             | 5,010.35         | 195   | 99.13%          | 98.33%                  |
| SE | 757,256,934   | 12,465   | 892,615         | 153,343 | 30.43             | 4,932.50         | 103   | 99.17%          | 98.26%                  |

Table 6: Detailed statistics for the openings solved by ONLINE-SP+CP.

|    | # Nodes       | Time (s) | Manager # Nodes | # Jobs  | Avg. Job Time (s) | Avg. Job # Nodes | # PCN | Solved Jobs (%) | Avg. Worker Loading (%) |
|----|---------------|----------|-----------------|---------|-------------------|------------------|-------|-----------------|-------------------------|
| JA | 1,425,668,707 | 24,865   | 1,370,665       | 278,183 | 33.85             | 5,120.00         | 225   | 99.45%          | 98.18%                  |
| JB | 1,601,479,130 | 31,455   | 1,743,905       | 351,934 | 33.16             | 4,545.55         | 283   | 99.50%          | 95.31%                  |
| JC | 414,108,746   | 8,343    | 693,560         | 140,608 | 17.68             | 2,940.20         | 69    | 99.54%          | 75.26%                  |
| JD | 502,966,563   | 10,896   | 401,057         | 89,954  | 45.82             | 5,586.92         | 103   | 99.13%          | 98.44%                  |
| KA | 104,905,173   | 1,931    | 109,111         | 23,739  | 28.97             | 4,414.51         | 18    | 98.21%          | 95.83%                  |
| KB | 2,527,488,112 | 43,200   | 3,148,579       | 578,009 | 27.79             | 4,367.30         | 386   | 99.59%          | 96.09%                  |
| KC | 25,508,784    | 706      | 58,399          | 13,172  | 10.58             | 1,932.16         | 6     | 99.18%          | 53.65%                  |
| KD | 920,902,808   | 16,357   | 1,092,352       | 210,345 | 27.80             | 4,372.87         | 148   | 99.57%          | 91.15%                  |
| KE | 168,590,287   | 3,095    | 214,173         | 42,447  | 26.24             | 3,966.74         | 28    | 98.81%          | 94.79%                  |
| KF | 2,027,558,505 | 35,197   | 2,203,830       | 383,317 | 34.79             | 5,283.76         | 305   | 99.57%          | 98.33%                  |
| DA | 1,665,511,033 | 28,337   | 2,252,356       | 377,189 | 27.77             | 4,409.62         | 235   | 99.53%          | 95.57%                  |
| SA | 41,796,555    | 1,105    | 95,672          | 21,325  | 10.67             | 1,955.49         | 10    | 98.67%          | 55.73%                  |
| SB | 109,591,487   | 2,258    | 167,238         | 34,085  | 19.62             | 3,210.33         | 20    | 98.04%          | 78.12%                  |
| SC | 93,535,813    | 1,655    | 94,822          | 21,820  | 26.28             | 4,282.36         | 15    | 98.12%          | 93.49%                  |
| SD | 1,485,439,307 | 25,531   | 1,674,274       | 296,617 | 32.26             | 5,002.29         | 224   | 99.15%          | 97.12%                  |
| SE | 1,200,741,176 | 20,428   | 1,289,405       | 231,498 | 33.15             | 5,181.26         | 182   | 99.17%          | 98.01%                  |

the workers, thereby increasing the solving time. Note that the appropriate  $v_{thr}$  may vary for different

games and for different numbers of available workers. It is possible to adjust  $v_{thr}$  dynamically during solving, which is left for future work.

Table 7: The solving time, average job completion time, and success rate of solvable jobs for solving opening  $JC$  by the baseline solver with different PCN thresholds.

| $v_{thr}$ | Time (s) | Avg. Job Time (s) | Solved Jobs (%) |
|-----------|----------|-------------------|-----------------|
| 11.5      | 23,559   | 2.00              | 99.92%          |
| 12.5      | 22,870   | 3.60              | 99.84%          |
| 13.5      | 18,356   | 5.75              | 99.74%          |
| 14.5      | 19,458   | 12.06             | 99.55%          |
| 15.5      | 12,519   | 16.29             | 99.29%          |
| 16.5      | 12,514   | 23.66             | 98.96%          |
| 17.5      | 12,877   | 33.73             | 98.34%          |
| 18.5      | 17,536   | 46.06             | 97.35%          |
| 19.5      | 22,343   | 52.04             | 96.75%          |
| 20.5      | 24,469   | 58.73             | 95.99%          |
| 21.5      | 27,810   | 70.50             | 94.94%          |

## B.5 Comparison to offline fine-tuning

We now investigate how much benefit we can gain from offline fine-tuning for a specific opening. To do this, we first train  $\theta_0$  by generating 400,000 self-play games (around 52 1080Ti GPU-hours) from the empty board. The resulting network is the same as the one referred to as  $\theta_0$  in the main text. Next, we fine-tune  $\theta_0$  by generating 200,000 additional self-play games (around 26 1080Ti GPU-hours) from the specific opening we are interested in. That is, if we want to solve the opening  $JC$ , we generate self-play games starting from that opening, and perform updates on  $\theta_0$  to obtain what we refer to as  $\theta'_0$ - $JC$ . For this experiment, we used four openings, so the networks  $\theta'_0$ - $JC$ ,  $\theta'_0$ - $KE$ ,  $\theta'_0$ - $DA$ , and  $\theta'_0$ - $SE$  were produced. Lastly, in the baseline case, we do not update the network with critical positions; the same network is used all throughout the proof search. In ONLINE-CP, critical positions are chosen and the  $\theta'_0$  is further fine-tuned using the OFT (resulting in  $\theta'_1, \theta'_2, \dots, \theta'_t, \dots$ ).

Table 8: Comparing the impact of a single batch, offline fine-tuning, i.e. pre-training for the specific opening instead of from an empty board.

|    | w/o offline fine-tuning ( $\theta_0$ ) |           | w/ offline fine-tuning ( $\theta'_0$ ) |           |
|----|----------------------------------------|-----------|----------------------------------------|-----------|
|    | BASELINE                               | ONLINE-CP | BASELINE                               | ONLINE-CP |
| JC | 12,514                                 | 6,537     | 22,748                                 | 10,099    |
| KE | 18,771                                 | 3,336     | 2,248                                  | 2,417     |
| DA | 112,874                                | 30,313    | 90,298                                 | 33,055    |
| SE | 64,227                                 | 12,465    | 28,905                                 | 42,522    |

Table 8 shows the times for solving these four openings with and without offline fine-tuning. The left two columns use  $\theta_0$  while the right two columns use  $\theta'_0$ . With offline fine-tuning, the solving times for these openings generally decrease in the baseline solver, since the  $\theta'_0$  is specifically fine-tuned for each opening, but exceptions may still occur, as in opening  $JC$ . However, when using  $\theta'_0$ , the solving times for ONLINE-CP increase for opening  $JC$ ,  $DA$ , and  $SE$ . This may be because  $\theta'_0$  only helps learn better heuristics for the opening positions, but does not always guarantee providing accurate heuristics for all varieties of positions during solving. In addition, it is worth noting that although offline fine-tuned  $\theta'_0$  accelerates the solving time for the baseline solver, it is impractical since we cannot expect to pre-train  $\theta'_0$  for each opening, especially if our eventual goal is to solve complete games from an empty board outright. In contrast, our online fine-tuning solver provides an automatic method that fine-tunes the PCN dynamically without too much extra computation cost.

## References

- [1] Ti-Rong Wu, Chung-Chin Shih, Ting Han Wei, Meng-Yu Tsai, Wei-Yuan Hsu, and I-Chen Wu. AlphaZero-based Proof Cost Network to Aid Game Solving. In *10th International Conference on Learning Representations, ICLR 2022*, 2022.
- [2] Ivo Danihelka, Arthur Guez, Julian Schrittwieser, and David Silver. Policy improvement by planning with Gumbel. In *10th International Conference on Learning Representations, ICLR 2022*, 2022.
- [3] Chung-Chin Shih, Ti-Rong Wu, Ting Han Wei, and I-Chen Wu. A Novel Approach to Solving Goal-Achieving Problems for Board Games. In *36th AAAI Conference on Artificial Intelligence, AAAI 2022*, volume 36, pages 10362–10369, 2022.
- [4] Chung-Chin Shih, Ting Han Wei, Ti-Rong Wu, and I-Chen Wu. A Local-Pattern Related Look-Up Table. *IEEE Transactions on Games*, 2023.
- [5] Andrew J Palay. *Searching with Probabilities*. PhD thesis, Carnegie Mellon University, 1983.
- [6] Akihiro Kishimoto and Martin Müller. A General Solution to the Graph History Interaction Problem. In *19th AAAI Conference on Artificial Intelligence, AAAI 2004*, volume 4, pages 644–649, 2004.
- [7] Akihiro Kishimoto and Martin Müller. A solution to the GHI problem for depth-first proof-number search. *Information Sciences*, 175(4):296–314, 2005.
